# Supplementary material
Source: PubMed Central journal article supplement (PMC4720966)
Supplement: NIHMS685374-supplement-1.pdf [file NIHMS685374-supplement-1.pdf]

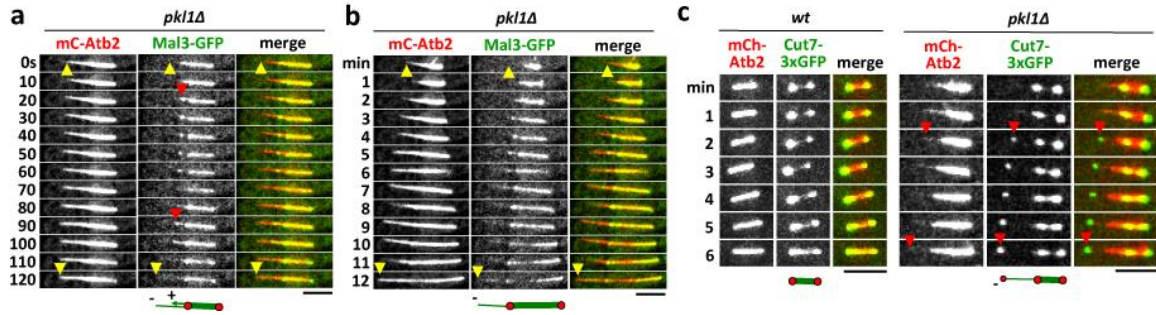

### Supplementary Figure 1. Long MT protrusions are likely minus-ended MTs.

**a)** High-temporal resolution (10s interval) time-lapse images of a mitotic spindle of a *pk11Δ* cell expressing mCherry-Atb2 and Mal3-GFP. Mal3-GFP is present all along the spindle. Distinct dot of Mal3-GFP tracks the short growing MT (red arrow head, time 20-60s), and disappears when the MT depolymerizes (time 70s). In contrast, the long MT has no Mal3-GFP at its tip (yellow arrow head). This long MT is stable and does not depolymerize. Note that the MT protrusion can contain more than one individual MT, with both Mal3-GFP labeling and no labeling. Scale bar, 5 $\mu$ m.

**b)** Low-temporal resolution (1min interval) time-lapse images of a mitotic spindle of a *pk11Δ* cell expressing mCherry-Atb2 and Mal3-GFP. The long MT protrusion (yellow arrow head) persisted for 12min. This relatively stability is indicative of MT minus ends. Scale bar, 5 $\mu$ m.

**c)** Time-lapse images of *wt* and *pk11Δ* mitotic cells expressing mCherry-Atb2 and Cut7-3xGFP (kinesin-5 cut7 can move toward to MT minus end<sup>6</sup>). In the *wt* cell, Cut7-3xGFP localizes to the spindle, and prominently at the spindle poles. In the *pk11Δ* cell, where there is a long MT protrusion (red arrow head), in addition to localizing to the spindle and spindle poles, Cut7-3xGFP also accumulates at the end of the MT protrusion. Scale bar, 5 $\mu$ m.

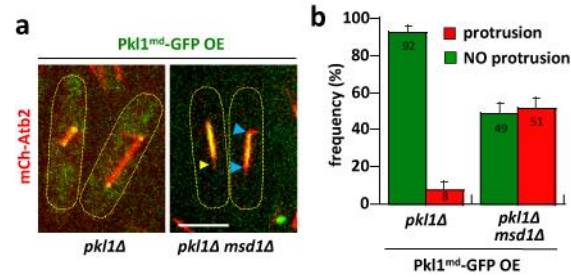

## Supplementary Figure 2. Msd1 functions in the same pathway as Pkl1.

**a)** Images of *pk11Δ* and double-deletion *pk11Δ msd1Δ* cells over-expressing (OE) the rigor mutant Pkl1<sup>md</sup>-GFP. In *pk11Δ* cells, Pkl1<sup>md</sup>-GFP can still localize to the spindle poles. In contrast, in *pk11Δ msd1Δ* cells, Pkl1<sup>md</sup>-GFP binds along the spindle length, with no clear accumulation at the spindle poles (blue arrow head). Note that MT protrusion (yellow arrow head) can be seen in the *pk11Δ msd1Δ* cells expressing Pkl1<sup>md</sup>-GFP. Scale bar, 5μm.

**b)** Comparative plot of frequency of MT protrusions in *pk11Δ* (n=38) and *pk11Δ msd1Δ* (n=39) cells expressing Pkl1<sup>md</sup>-GFP. The *pk11Δ* cells have 8% MT protrusion, indicating that the rigor Pkl1<sup>md</sup>-GFP can mostly (but not completely) rescue the *pk11Δ* MT protrusion phenotype (see Fig. 2e for comparison). The *pk11Δ msd1Δ* cells have 51% MT protrusion, indicating that in the absence of Msd1, the rigor Pkl1<sup>md</sup>-GFP can partially rescue the *msd1Δ* MT protrusion phenotype (see Fig. 2e for comparison). Bars represent mean ± s.d. for multiple experiments.

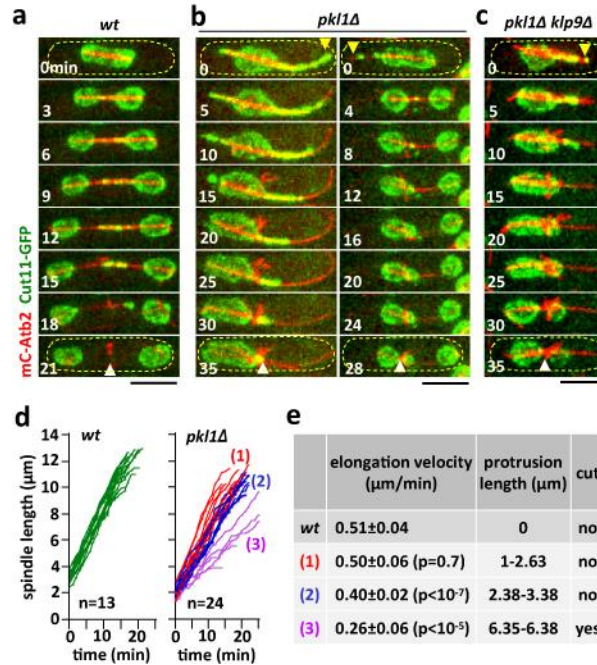

### Supplementary Figure 3. Long MT protrusions lead to chromosome cut.

Time-lapse images of *wt*, *pk11Δ*, and *pk11Δ klp9Δ* cells expressing mCherry-Atb2 and Cut11-GFP. **a)** The *wt* cell shows symmetric and equal segregation of the daughter nuclei into daughter cells at cytokinesis (white arrow head). **b)** In contrast, *pk11Δ* cells can have unequal distribution of daughter nuclei. The first panel shows one daughter cell with 2 nuclei and its sister with no nucleus. The second panel shows one daughter cell with 1 nucleus and a micro-nucleus, with its sister having less than 1N chromosome. **c)** The double-deletion *pk11Δ klp9Δ* cell shows one daughter cell with 1 large nucleus and, with its sister having a small nucleus. Scale bar, 5μm.

**d)** Spindle length versus time plots comparing anaphase B spindle dynamics of *wt* and *pk11Δ* cells. In contrast to *wt*, spindle dynamics in *pk11Δ* cells are varied, approximately falling into three groups. Group (1) has similar dynamics as *wt*. Group (2) has slower elongation dynamics compared to *wt*, but exhibits no chromosome loss. Group (3) is markedly different than *wt*, and has aneuploidy.

**e)** Quantification of spindle dynamics, protrusion lengths, and aneuploidy in *wt* and *pk11Δ* cells. Shown are mean ± s.d. Student-t test provides p values.

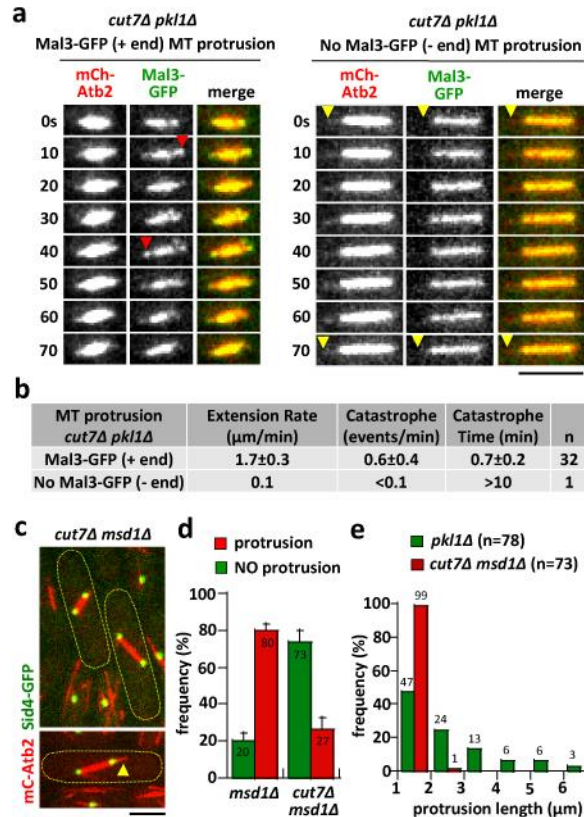

#### Supplementary Figure 4. Cut7 functions to slide minus-ended MTs into long protrusions.

**a)** High-temporal resolution (10s interval) time-lapse images of mitotic spindles of *cut7Δ pk11Δ* cells expressing mCherry-Atb2 and Mal3-GFP. We observed only short MT protrusions (23 mitotic cells, 32 independent MT protrusions). First panel, the short MT protrusion has Mal3-GFP at its end (red arrow head). Second panel, we observed only 1 MT protrusion with no Mal3-GFP at its end (in 23 mitotic cells). Scale bar, 5 $\mu\text{m}$ .

**b)** Comparison of MT dynamic parameters between MT protrusions with and without Mal3-GFP localization at their ends in *cut7Δ pk11Δ* cells. Based on the relative stability of the one MT end without Mal3-GFP, this end can be classified as minus end.

**c)** Images of double-deletion *cut7Δ msd1Δ* cells expressing mCherry-Atb2 and Sid4-GFP. The *cut7Δ msd1Δ* cells formed bipolar spindles, and showed only short MT protrusions (yellow arrow head), similar to *cut7Δ pk11Δ* cells (see Fig. 4b). This indicates that Msd1 and Pkl1 function in the same pathway.

**d)** Comparative plot of frequency of MT protrusions in *msd1Δ* (n=48) and *cut7Δ msd1Δ* (n=47) cells. The *msd1Δ* cells have 80% MT protrusion. In contrast, *cut7Δ msd1Δ* cells have 27% MT protrusion, indicating that Cut7 functions to slide the unfocused MT minus ends in *msd1Δ* cells producing the aberrant MT protrusions. Bars represent mean  $\pm$  s.d. for multiple experiments.

**e)** Plot of MT protrusion length distribution frequency in *pk11Δ* and *cut7Δ msd1Δ* cells. For *pk11Δ* cells, MT protrusions extend from 1 $\mu$ m (the defined minimum length for reliable measurement) up to 7 $\mu$ m. 71% of protrusions are shorter than 3 $\mu$ m, and 29% of protrusions are longer than 3 $\mu$ m. In contrast, all MT protrusions are shorter than 3 $\mu$ m in the *cut7Δ msd1Δ* cells. This suggests that Msd1 and Pkl1 are in the same pathway (compare with Fig. 1e and Fig. 4d), and that Cut7 functions to produce minus end MT protrusions in *msd1Δ* (or *pk11Δ*) cells. Frequencies are pooled from multiple experiments.

## Supplementary Table 1. List of Strains

| Strain  | Genotype                                                                                             |
|---------|------------------------------------------------------------------------------------------------------|
| PT.3219 | sid4-GFP:KanR mCherry-atb2:HphR ade6-m210 leu1-32 ura4-D18 h-                                        |
| PT.3280 | pk11Δ:NatR sid4-GFP:KanR mCherry-atb2:HphR ade6-m210? leu1-32 ura4-D18 h+                            |
| PT.3207 | cut11-GFP:NatR mCherry-atb2:HphR ade6-m210? leu1-32 ura4-D18 h+                                      |
| PT.3210 | pk11Δ:KanR cut11-GFP:NatR mCherry-atb2:HphR ade6-m210? leu1-32 ura4-D18 h+                           |
| CF.658  | mini Chromosome ch16:ADE6+ ade6-m216 leu1-32 his2 h+                                                 |
| PT.3774 | pk11Δ:NatR miniChromosome ch16:ade6-m216 leu1-32 his2 h-                                             |
| PT.3841 | pk11Δ:NatR mal3-linker-GFP:KanR mcherry-atb2:HphR ade6-m210? leu1-32 ura4-D18 h?                     |
| PT.2973 | cut7-3xGFP:KanMX mCherry-atb2:hph ade6-m210? leu1-32 ura4-D18 h-                                     |
| PT.3380 | pk11Δ:NatR cut7-3xGFP:KanMX mCherry-atb2:hph ade6-m210? leu1-32 ura4-D18 h+                          |
| PT.3765 | msd1Δ:KanR sid4-GFP:KanR mCherry-atb2:HphR ade6-m210 leu1-32 ura4-D18 h-                             |
| PT.3767 | pk11Δ:NatR msd1Δ:KanR sid4-GFP:KanR mCherry-atb2:HphR ade6-m210 leu1-32 ura4-D18 h-                  |
| PT.2753 | pk11-3xGFP:KanR mCherry-atb2:HphR ade6-m210? leu1-32 ura4-D18 h+                                     |
| PT.3559 | msd1Δ:NatR pk11-3xGFP:KanR mCherry-atb2:HphR ade6-m210 leu1-32 ura4-D18 h+                           |
| PT.3477 | msd1-GFP:KanR mCherry-atb2:HphR ade6-m210? leu1-32 ura4-D18 h-                                       |
| PT.3480 | pk11Δ:NatR msd1-GFP:KanR mCherry-atb2:HphR ade6-m210? leu1-32 ura4-D18 h-                            |
| PT.3808 | nmt-pk11-GFP:LEU1+ pk11Δ:KanR mCherry-atb2:HphR ade6-m210? leu1-32 h-                                |
| PT.3937 | nmt-pk11-GFP:LEU1+ pk11Δ:KanR msd1Δ:NatR mCherry-atb2:HphR ade6-m210? leu1-32 ura4-D18 h-            |
| PT.3981 | msd1Δ:KanR mCherry-atb2:HphR ade6-m210? leu1-32 ura4-D18 h+ [pPT.419 nmt1-msd1-YFP:URA4+]            |
| PT.3985 | msd1Δ:KanR pk11Δ:NatR mCherry-atb2:HphR ade6-m210? leu1-32 ura4-D18 h- [pPT.419 nmt1-msd1-YFP:URA4+] |
| PT.3775 | msd1Δ:NatR miniChromosome ch16:ade6-m216 leu1-32 his2 h?                                             |
| PT.3777 | pk11Δ:NatR msd1Δ:KanR miniChromosome ch16:ade6-m216 leu1-32 his2 h?                                  |
| PT.3811 | nmt-rigor-pk11-GFP:LEU1+ pk11Δ:KanR mCherry-atb2:HphR ade6-m210? leu1-32 h-                          |
| PT.3939 | nmt-rigor-pk11-GFP:LEU1+ pk11Δ:KanR msd1Δ:NatR mCherry-atb2:HphR ade6-m210? leu1-32 h+               |
| CF.124  | mis12-GFP:LEU1+ mCherry-atb2:HphR ade6-m210 leu1-32 ura4-D18 h-                                      |
| PT.3235 | pk11Δ:KanR mis12-GFP:LEU1+ mCherry-atb2:HphR ade6-m210? leu1-32 ura4-D18 h?                          |
| PT.3251 | hht2-GFP:URA4+ mCherry-atb2:HphR ade6-m210? leu1-32 ura4-D18 h-                                      |
| PT.3382 | pk11Δ:NatR hht2-GFP:URA4+ mcherry-atb2:hph ade6-m210? leu1-32 ura4-D18 h+                            |
| PT.3681 | pk11Δ:KanR hht2-GFP:URA4+ mcherry-atb2:hph ade6-m210? leu1-32 ura4-D18 h-                            |
| PT.3818 | pk11Δ:NatR mad2Δ: KanR mis12-GFP:LEU1+ mCherry-atb2:HphR ade6-m210? leu1-32 ura4-D18 h?              |
| PT.4043 | klp9Δ:URA4+ pk11Δ:KanR cut11-GFP:NatR mCherry-atb2:HphR ade6-m210? leu1-32 ura4-D18 h-               |
| PT.3763 | pk11Δ:NatR klp9Δ:URA4+ sid4-GFP:KanR mCherry-atb2:HphR ade6-m210? leu1-32 ura4-D18 h?                |
| PT.3729 | pk11Δ:KanR cut7Δ:NatR+ sid4-GFP:KanR mCherry-atb2:HphR ade6-m210? leu1-32 ura4-D18 h-                |
| PT.3942 | hht2-GFP:URA4+ mCherry-atb2:HphR cdc25-22 ade6-m210? leu1-32 ura4-D18 h-                             |
| PT.3944 | pk11Δ:NatR hht2-GFP:URA4+ mCherry-atb2:HphR cdc25-22 ade6-m210? leu1-32 ura4-D18 h-                  |
| PT.4003 | cut7Δ:NatR pk11Δ:KanR mal3-linker-GFP:KanR mcherry-atb2:HphR ade6-m210? leu1-32 ura4-D18 h-          |
| PT.4060 | msd1Δ:KanR cut7Δ:NatR sid4-GFP:KanR mCherry-atb2:HphR ade6-m210? leu1-32 ura4-D18 h+                 |
